# Supplementary material for: Head capsule stacking by caterpillars: morphology complements behaviour to provide a novel defence
Source: PeerJ. 2016 Feb 29;4:e1714. doi: 10.7717/peerj.1714 (PMC4782731; doi:10.7717/peerj.1714)
Supplement: Data S1 [file peerj-04-1714-s001.xlsx]

## Sheet: Mixed batches- raw data
Replicate ID	Set date (D0)	Location details	# +HC caterpillars set	# -HC caterpillars set	Host plant	Check date (D4 )	# +HC caterpillars remaining (D4)	# -HC caterpillars remaining (D4)	Collection date (D8)	# +HC caterpillars remaining (D8)	# +HC preyed upon	# +HC parasitised	# +HC dead (unknown cause)	# +HC survived to adult	Check +HC	# -HC caterpillars remaining (D8)	# -HC preyed upon	# -HC parasitised	# -HC dead (unknown cause)	# -HC survived to adult	Check -HC	Notes
1M	2013-12-27	near first carpark	5	5	Eucalyptus	2013-12-31	2	1	2014-01-04	2	3				3	0	4	0	1	0	5	Damage present, indicating they had settled; one dead -HC caterpillar at D4; branches/leaves very dense and so not confident can adequately check for remaining cats
2M	2013-12-27	near second carpark	5	5	Eucalyptus	2013-12-31	1	0	2014-01-04	1	4				4	0	5	0	0	0	5
3M	2013-12-27	lookout carpark	5	5	Eucalyptus	2013-12-31	4	3	2014-01-04	0	5	0	0	0	5	0	5	0	0	0	5	Damage and moults present
4M	2013-12-27	near start of walk	5	5	Angophora	2013-12-31	0	0	2014-01-04	0	5	0	0	0	5	0	5	0	0	0	5
5M	2013-12-27	on path to lookout	5	5	Eucalyptus	2013-12-31	4	3	2014-01-04	3	2				2	1	4				4
6M	2013-12-28	George Head lookout	5	5	Angophora	2014-01-01	5	4	2014-01-05	0	5	0	0	0	5	1	4				4	Remaining caterpillar had one HC so assume it was a -HC cat that moulted (rather than being a +HC cat that lost HCs)
7M	2013-12-28	George Head lookout	5	5	Eucalyptus	2014-01-01	0	0	2014-01-05	0	5	0	0	0	5	0	5	0	0	0	5
8M	2013-12-28	George Head lookout	5	5	Eucalyptus	2014-01-01	1	0	2014-01-05	1	4				4	0	5	0	0	0	5
9M	2013-12-28	near George Head lookout	5	5	Angophora	2014-01-01	0	0	2014-01-05	0	5	0	0	0	5	0	5	0	0	0	5
10M	2013-12-28	front park	5	5	Eucalyptus	2014-01-01	4	3	2014-01-05	4	1				1	3	2				2	Each of the 3 remaining -HC cats each had 1 HC (i.e. they moulted between D4 and D8)
11M	2014-01-08	stairs in carpark	5	5	Eucalyptus	2014-01-12	0	1	2014-01-16	0	4	0	1	0	5	0	5	0	0	0	5	1 dead cat with 2 HCs (i.e. from +HC treatment)
12M	2014-01-08	base of stairs	5	5	Eucalyptus	2014-01-12	0	0	2014-01-16	0	5	0	0	0	5	0	5	0	0	0	5	lots of remains present
13M	2014-01-08	stone marker	5	5	Eucalyptus	2014-01-12	3	3	2014-01-16	2	3				3	1	4				4
14M	2014-01-08	track RHS	5	5	Eucalyptus	2014-01-12	4	4	2014-01-16	4	1				1	2	3				3
15M	2014-01-08	track RHS	5	5	Angophora	2014-01-12	0	1	2014-01-16	0	5	0	0	0	5	0	5	0	0	0	5	remains
16M	2014-01-09	track RHS	5	5	Eucalyptus	2014-01-13	3	1	2014-01-17	2	3				3	0	5	0	0	0	5	remains
17M	2014-01-09	yellow hut park	5	5	Eucalyptus	2014-01-13	0	0	2014-01-17	0	5	0	0	0	5	0	5	0	0	0	5	moults and damage present
18M	2014-01-09	yellow hut park, north	5	5	Eucalyptus	2014-01-13	0	0	2014-01-17	0	5	0	0	0	5	0	5	0	0	0	5
19M	2014-01-09	yellow hut park, north	5	5	Eucalyptus	2014-01-13	0	0	2014-01-17	0	5	0	0	0	5	0	5	0	0	0	5	damage present
20M	2014-01-09	track RHS	5	5	Eucalyptus	2014-01-13	1	1	2014-01-17	0	5	0	0	0	5	0	5	0	0	0	5	lots of damage; 1 dead +HC cat at D4 (in blanket of silk), a second dead +HC cat in silk at D8

## Sheet: Separate batches- raw data
Replicate ID	Set date (D0)	Location details	# caterpillars set	Host plant	Batch type	Check date (D4 )	# caterpillars remaining (D4)	Collection date (D8)	# caterpillars remaining (D8)	# preyed upon	# parasitised	# dead (unknown cause)	# survived to adult	Check	Notes
1+	2013-12-27	near carpark	10	Eucalyptus	+	2013-12-31	2	2014-01-04	2	8				8	one of the cats didn’t have HCs; bad replicate because branches/leaves really dense so hard to search
1-	2013-12-27	near carpark	10	Eucalyptus	-	2013-12-31	0	2014-01-04	0	10	0	0	0	10	damage present, indicating had settled
2+	2013-12-27	near second carpark	10	Eucalyptus	+	2013-12-31	0	2014-01-04	0	10	0	0	0	10
2-	2013-12-27	near second carpark	10	Eucalyptus	-	2013-12-31	1	2014-01-04	1	9				9
3+	2013-12-27	lookout carpark	10	Eucalyptus	+	2013-12-31	8	2014-01-04	6	4				4
3-	2013-12-27	lookout carpark	10	Eucalyptus	-	2013-12-31	9	2014-01-04	9	1				1
4+	2013-12-27	start of walk	10	Angophora	+	2013-12-31	0	2014-01-04	0	10	0	0	0	10	lots of ants near tree
4-	2013-12-27	start of walk	10	Angophora	-	2013-12-31	1	2014-01-04	0	10	0	0	0	10	lots of ants near tree
5+	2013-12-27	on path near lookout	10	Eucalyptus	+	2013-12-31	8	2014-01-04	8	2				2
5-	2013-12-27	on path near lookout	10	Eucalyptus	-	2013-12-31	6	2014-01-04	5	4		1		5	also 1 individual found dead; two of the five alive cats had cocoons next to them, one of these caterpillars seemed to survive parasitism by moulting (?)
6+	2013-12-28	George Head lookout	10	Eucalyptus	+	2014-01-01	0	2014-01-05	0	10	0	0	0	10
6-	2013-12-28	George Head lookout	10	Eucalyptus	-	2014-01-01	0	2014-01-05	0	10	0	0	0	10
7+	2013-12-28	George Head lookout	10	Eucalyptus	+	2014-01-01	0	2014-01-05	0	10	0	0	0	10
7-	2013-12-28	George Head lookout	10	Eucalyptus	-	2014-01-01	2	2014-01-05	0	10	0	0	0	10
8+	2013-12-28	George Head lookout	10	Eucalyptus	+	2014-01-01	1	2014-01-05	0	10	0	0	0	10	found head capsules/caterpillar remains maybe from spider predation
8-	2013-12-28	George Head lookout	10	Eucalyptus	-	2014-01-01	1	2014-01-05	1	9				9
9+	2013-12-28	near George Head lookout	10	Angophora	+	2014-01-01	0	2014-01-05	0	10	0	0	0	10
9-	2013-12-28	near George Head lookout	10	Angophora	-	2014-01-01	0	2014-01-05	0	10	0	0	0	10
10+	2013-12-28	front park	10	Eucalyptus	+	2014-01-01	6	2014-01-05	4	5		1		6	also 1 individual found dead
10-	2013-12-28	front park	10	Eucalyptus	-	2014-01-01	10	2014-01-05	9	0		1		1	also 1 individual found dead; all have 1 HC so they moulted between D4 and D8
11+	2014-01-08	stairs in carpark	10	Eucalyptus	+	2014-01-12	6	2014-01-16	1	9				9
11-	2014-01-08	stairs in carpark	10	Eucalyptus	-	2014-01-12	3	2014-01-16	0	10	0	0	0	10
12+	2014-01-08	stairs in carpark	10	Angophora	+	2014-01-12	0	2014-01-16	0	10	0	0	0	10	moults and damage present
12-	2014-01-08	stairs in carpark	10	Angophora	-	2014-01-12	0	2014-01-16	0	10	0	0	0	10
13+	2014-01-08	track RHS	10	Eucalyptus	+	2014-01-12	2	2014-01-16	1	9				9	wild uraba at base of tree
13-	2014-01-08	track RHS	10	Eucalyptus	-	2014-01-12	9	2014-01-16	5	5				5
14+	2014-01-08	track LHS	10	Eucalyptus	+	2014-01-12	8	2014-01-16	8	2				2
14-	2014-01-08	track LHS	10	Eucalyptus	-	2014-01-12	6	2014-01-16	0	10	0	0	0	10	remains
15+	2014-01-08	track LHS	10	Eucalyptus	+	2014-01-12	0	2014-01-16	0	9	0	1	0	10	1 dead cat
15-	2014-01-08	track LHS	10	Eucalyptus	-	2014-01-12	3	2014-01-16	3	7				7
16+	2014-01-09	track RHS, boardwalk	10	Eucalyptus	+	2014-01-13	2	2014-01-17	1	9				9
16-	2014-01-09	track RHS	10	Eucalyptus	-	2014-01-13	9	2014-01-17	3	7				7	remains
17+	2014-01-09	yellow hut park	10	Eucalyptus	+	2014-01-13	0	2014-01-17	0	10	0	0	0	10	remains and damage present
17-	2014-01-09	yellow hut park	10	Eucalyptus	-	2014-01-13	0	2014-01-17	0	10	0	0	0	10	moults and damage present
18+	2014-01-09	yellow hut park, north	10	Eucalyptus	+	2014-01-13	1	2014-01-17	0	10	0	0	0	10	damage present, indicating had settled
18-	2014-01-09	yellow hut park, north	10	Eucalyptus	-	2014-01-13	7	2014-01-17	1	9				9	lots of damage present
19+	2014-01-09	yellow hut park, north	10	Angophora	+	2014-01-13	0	2014-01-17	0	10	0	0	0	10
19-	2014-01-09	yellow hut park, north	10	Angophora	-	2014-01-13	0	2014-01-17	0	10	0	0	0	10
20+	2014-01-09	yellow hut park, RHS border	10	Eucalyptus	+	2014-01-13	0	2014-01-17	0	10	0	0	0	10	damage and moults
20-	2014-01-09	yellow hut park, RHS border	10	Eucalyptus	-	2014-01-13	2	2014-01-17	1	9				9
